# Supplementary material for: Self-cleaning and superhydrophobic CuO coating by jet-nebulizer spray pyrolysis technique
Source: Royal Society of Chemistry journal article supplement (doi:10.1039/c5ce00177c), 2015-01-01
Supplement: c5ce00177c1.pdf [file c5ce00177c1.pdf]

## Self-cleaning and robust superhydrophobic CuO coating by jet-nebulizer spray pyrolysis technique

Sanjay S. Lathe,<sup>a</sup> P.Sudhagar,<sup>a\*</sup> C. Ravidhas,<sup>b\*</sup> A. Jennifer christy,<sup>b</sup> D. David Kirubakaran,<sup>b</sup> R.Venkatesh,<sup>b</sup> Anitha Devadoss,<sup>a</sup> C. Terashima,<sup>a,c</sup> K. Nakata<sup>a,c</sup> and Akira Fujishima<sup>a,c</sup>

### S1. Contact angle

Table S1. Contact angles of different CuO coatings on glass substrates

| Sample | Contact angle |
|--------|---------------|
| CuO-10 | 130°          |
| CuO-20 | 140°          |
| CuO-30 | 154°          |
| CuO-40 | 125°          |
